# Supplementary material for: Clinical characteristics, hospital days, hospitalization costs, and in-hospital mortality among patients in a dermatological intensive care unit: a single-center retrospective study from China
Source: Research Square preprint supplement (doi:10.21203/rs.3.rs-6113471/v1), 2025-03-11
Supplement: Supplementary file 1 [file 1f3be7a76b58d334935d219a.docx]

**Supplementary Table 1. Hospital stays per patient in the DICU under different variables**

| Variable | N | Hospital stays, days | | *P*-value |
| --- | --- | --- | --- | --- |
| Mean (SD) | Median (IQR) |
| All | 825 | 12.6 (7.9) | 11.0 (7.0-15.0) |  |
| Sex assigned at birth* |  |  |  | 0.046 |
| Male | 480 | 12.3 (8.4) | 10.3 (7.0-15.0) |  |
| Female | 345 | 12.9 (7.2) | 11.0 (8.0-16.0) |  |
| Age, years |  |  |  | 0.231 |
| <20 | 7 | 9.4 (7.0) | 7.0 (4.5-12.5) |  |
| 20-39 | 155 | 12.4 (7.9) | 11.0 (7.0-15.0) |  |
| 40-59 | 244 | 12.5 (7.7) | 11.0 (7.0-16.0) |  |
| 60-79 | 334 | 13.1 (8.5) | 11.0 (8.0-16.0) |  |
| ≥80 | 85 | 11.3 (5.9) | 10.0 (7.0-13.0) |  |
| Comorbidity number*** |  |  |  | <0.001 |
| 0 | 384 | 11.0 (6.5) | 10.0 (7.0-14.0) |  |
| 1 | 178 | 12.4 (7.9) | 10.5 (7.0-15.4) |  |
| 2 | 134 | 13.9 (9.3) | 12.0 (8.0-17.0) |  |
| 3 | 65 | 15.5 (7.3) | 14.0 (11.0-20.0) |  |
| ≥4 | 64 | 16.5 (9.9) | 13.0 (10.0-20.3) |  |
| Hypertension |  |  |  | 0.080 |
| NO | 669 | 12.5 (8.1) | 11.0 (7.0-15.0) |  |
| YES | 156 | 13.1 (6.8) | 11.0 (8.0-16.0) |  |
| Diabetes mellitus** |  |  |  | 0.008 |
| NO | 706 | 12.3 (7.8) | 11.0 (7.0-15.0) |  |
| YES | 119 | 14.3 (8.3) | 11.0 (8.0-17.5) |  |
| Abnormal liver function** |  |  |  | 0.004 |
| NO | 746 | 12.4 (7.9) | 10.8 (7.0-15.0) |  |
| YES | 79 | 14.4 (7.8) | 13.0 (9.5-18.3) |  |
| Pulmonary infection*** |  |  |  | <0.001 |
| NO | 755 | 12.1 (7.3) | 11.0 (7.0-15.0) |  |
| YES | 70 | 17.2 (11.7) | 14.5 (10.0-21.0) |  |
| Hematological disorders |  |  |  | 0.312 |
| NO | 764 | 12.5 (7.9) | 11.0 (7.0-15.5) |  |
| YES | 61 | 13.3 (8.2) | 12.0 (8.0-15.0) |  |
| Gastrointestinal disorders* |  |  |  | 0.030 |
| NO | 773 | 12.4 (7.8) | 11.0 (7.0-15.0) |  |
| YES | 52 | 14.8 (9.4) | 12.0 (9.4-18.0) |  |
| Arrhythmia |  |  |  | 0.781 |
| NO | 778 | 12.6 (7.9) | 11.0 (7.0-15.0) |  |
| YES | 47 | 12.7 (7.3) | 11.0 (7.0-15.5) |  |
| Skin infection** |  |  |  | 0.002 |
| NO | 782 | 12.3 (7.6) | 11.0 (7.0-15.0) |  |
| YES | 43 | 17.4 (11.2) | 15.0 (8.0-21.0) |  |
| Osteoporosis* |  |  |  | 0.021 |
| NO | 787 | 12.4 (7.8) | 11.0 (7.0-15.0) |  |
| YES | 38 | 15.4 (8.7) | 13.0 (9.3-17.0) |  |
| Hypoproteinaemia*** |  |  |  | <0.001 |
| NO | 791 | 12.3 (7.7) | 11.0 (7.0-15.0) |  |
| YES | 34 | 19.1 (10.3) | 17.0 (12.0-23.0) |  |
| Abnormal renal function* |  |  |  | 0.022 |
| NO | 792 | 12.5 (7.9) | 11.0 (7.0-15.0) |  |
| YES | 33 | 15.0 (8.0) | 14.0 (9.0-17.0) |  |
| Thyroid disorders* |  |  |  | 0.023 |
| NO | 793 | 12.5 (7.9) | 11.0 (7.0-15.0) |  |
| YES | 32 | 14.6 (6.6) | 13.0 (10.0-16.0) |  |
| Hyperlipidemia |  |  |  | 0.811 |
| NO | 796 | 12.5 (7.9) | 11.0 (7.0-15.1) |  |
| YES | 29 | 13.5 (8.4) | 11.0 (7.5-14.0) |  |
| Coronary heart disease |  |  |  | 0.071 |
| NO | 802 | 12.5 (7.9) | 11.0 (7.0-15.0) |  |
| YES | 23 | 14.3 (6.4) | 13.0 (10.0-16.8) |  |
| Hepatitis |  |  |  | 0.333 |
| NO | 804 | 12.6 (7.9) | 11.0 (7.0-15.0) |  |
| YES | 21 | 13.5 (7.2) | 14.0 (8.0-16.0) |  |
| Electrolyte abnormalities*** |  |  |  | <0.001 |
| NO | 805 | 12.4 (7.7) | 11.0 (7.0-15.0) |  |
| YES | 20 | 19.8 (11.0) | 16.5 (11.9-27.5) |  |
| Venous thrombosis |  |  |  | 0.108 |
| NO | 811 | 12.4 (7.4) | 11.0 (7.0-15.0) |  |
| YES | 14 | 21.7 (21.5) | 12.0 (10.3-28.6) |  |
| Interstitial lung disease |  |  |  | 0.401 |
| NO | 812 | 12.6 (7.9) | 11.0 (7.0-15.0) |  |
| YES | 13 | 14.3 (8.8) | 11.0 (11.0-16.0) |  |
| Urinary tract infection* |  |  |  | 0.011 |
| NO | 812 | 12.5 (7.9) | 11.0 (7.0-15.0) |  |
| YES | 13 | 16.4 (5.8) | 18.0 (13.0-20.0) |  |
| Cardiac dysfunction |  |  |  | 0.511 |
| NO | 813 | 12.6 (7.9) | 11.0 (7.0-15.0) |  |
| YES | 12 | 13.5 (6.8) | 10.5 (8.5-21.3) |  |
| Bloodstream infection*** |  |  |  | <0.001 |
| NO | 817 | 12.4 (7.7) | 11.0 (7.0-15.0) |  |
| YES | 8 | 30.4 (6.8) | 32.5 (26.5-35.3) |  |
| EBV/CMV infection* |  |  |  | 0.011 |
| NO | 817 | 12.5 (7.8) | 11.0 (7.0-15.0) |  |
| YES | 8 | 21.1 (9.7) | 24.0 (12.4-28.3) |  |
| Pulmonary embolism |  |  |  | 0.744 |
| NO | 819 | 12.6 (7.9) | 11.0 (7.0-15.3) |  |
| YES | 6 | 12.7 (6.8) | 13.0 (9.0-14.0) |  |
| Upper respiratory tract infection |  |  |  | 0.541 |
| NO | 821 | 12.6 (7.9) | 11.0 (7.0-15.0) |  |
| YES | 4 | 11.1 (10.1) | 8.5 (6.5-13.1) |  |
| Respiratory failure |  |  |  | 0.390 |
| NO | 822 | 12.6 (7.9) | 11.0 (7.0-15.0) |  |
| YES | 3 | 11.0 (10.4) | 5.0 (5.0-14.0) |  |

DICU, dermatology intensive care unit; IQR, interquartile range; SD, standard deviation. *p-value＜0.05, **p-value＜0.01, ***p-value＜0.001.

**Supplementary Table 2. Total cost per patient in the DICU under different variables**

| Variable | N | Total cost, USD | | *P*-value |
| --- | --- | --- | --- | --- |
| Mean (SD) | Median (IQR) |
| All | 825 | 5455 (4439) | 4196 (2655-7278) |  |
| Sex assigned at birth* |  |  |  | 0.040 |
| Male | 480 | 5297 (4259) | 4016 (2542-6806) |  |
| Female | 345 | 5674 (4675) | 4614 (2840-7632) |  |
| Age, years |  |  |  | 0.199 |
| <20 | 7 | 3157 (2824) | 1991 (1542-3490) |  |
| 20-39 | 155 | 5124 (3844) | 4274 (2553-6509) |  |
| 40-59 | 244 | 5614 (5310) | 4021 (2642-7073) |  |
| 60-79 | 334 | 5654 (4239) | 4429 (2754-7690) |  |
| ≥80 | 85 | 5007 (3426) | 4072 (2681-7438) |  |
| Hospital stays***, days |  |  |  | <0.001 |
| ≤7 | 218 | 2578 (1597) | 2100 (1578-3091) |  |
| 7-14 | 369 | 4730 (2385) | 3988 (2838-6378) |  |
| 14-21 | 150 | 7108 (3055) | 6293 (4617-9406) |  |
| 21-28 | 54 | 10041 (3776) | 9276 (7606-12450) |  |
| >28 | 34 | 17184 (9879) | 14999 (9792-21434) |  |
| Total drug cost***, USD |  |  |  | <0.001 |
| ≤1000 | 377 | 2629 (1116) | 2541 (1863-3283) |  |
| 1000-2000 | 118 | 4315 (1311) | 4145 (3486-4928) |  |
| 2000-3000 | 71 | 5956 (1607) | 5453 (4807-6739) |  |
| 3000-4000 | 70 | 6879 (1903) | 6498 (5709-7596) |  |
| >4000 | 189 | 11086 (5563) | 9764 (7954-12198) |  |
| Comorbidity number*** |  |  |  | <0.001 |
| 0 | 384 | 4262 (3182) | 3388 (2192-5595) |  |
| 1 | 178 | 5486 (4143) | 4210 (2736-6991) |  |
| 2 | 134 | 6336 (4204) | 5010 (3101-8402) |  |
| 3 | 65 | 7228 (3590) | 68265 (4724-8984) |  |
| ≥4 | 64 | 8875 (8489) | 6070 (4287-11100) |  |
| Hypertension* |  |  |  | 0.031 |
| NO | 669 | 5387 (4582) | 4061 (2525-7086) |  |
| YES | 156 | 5746 (3764) | 4580 (2952-7685) |  |
| Diabetes Mellitus*** |  |  |  | <0.001 |
| NO | 706 | 5208 (3983) | 3996 (2529-6996) |  |
| YES | 119 | 6921 (6346) | 5267 (3198-8533) |  |
| Abnormal liver Function*** |  |  |  | <0.001 |
| NO | 746 | 5310 (4463) | 4054 (2551-6845) |  |
| YES | 79 | 6818 (3972) | 6466 (3352-9187) |  |
| Pulmonary infection*** |  |  |  | <0.001 |
| NO | 755 | 5110 (3825) | 3975 (2543-6620) |  |
| YES | 70 | 9167 (7753) | 7841 (4727-11032) |  |
| Hematological disorders** |  |  |  | 0.009 |
| NO | 764 | 5397 (4453) | 4058 (2548-7418) |  |
| YES | 61 | 6173 (4230) | 5162 (4039-6464) |  |
| Gastrointestinal disorders*** |  |  |  | <0.001 |
| NO | 773 | 5302 (4349) | 4072 (2549-7008) |  |
| YES | 52 | 7728 (5140) | 6397 (3885-10249) |  |
| Arrhythmia |  |  |  | 0.559 |
| NO | 778 | 5469 (4517) | 4152 (2576-7176) |  |
| YES | 47 | 5220 (2877) | 4441 (3014-7784) |  |
| Skin infection*** |  |  |  | <0.001 |
| NO | 782 | 5237 (3821) | 4110 (2566-8432) |  |
| YES | 43 | 9406 (9909) | 6584 (3323-11246) |  |
| Osteoporosis** |  |  |  | 0.009 |
| NO | 787 | 5377 (4412) | 4140 (2570-7084) |  |
| YES | 38 | 7061 (4735) | 5541 (3712-8946) |  |
| Hypoproteinaemia*** |  |  |  | <0.001 |
| NO | 791 | 5215 (3875) | 4056 (2563-7014) |  |
| YES | 34 | 11032 (9951) | 7804 (5701-12615) |  |
| Abnormal renal function** |  |  |  | 0.005 |
| NO | 792 | 5388 (4402) | 4105 (2569-7087) |  |
| YES | 33 | 7060 (5053) | 5604 (4145-8481) |  |
| Thyroid disorders** |  |  |  | 0.003 |
| NO | 793 | 5394 (4443) | 4107 (2570-7089) |  |
| YES | 32 | 6952 (4105) | 6295 (4029-8593) |  |
| Hyperlipidemia |  |  |  | 0.539 |
| NO | 796 | 5421 (4409) | 4204 (2636-7090) |  |
| YES | 29 | 6394 (5180) | 3840 (2796-8557) |  |
| Coronary heart disease |  |  |  | 0.095 |
| NO | 802 | 5439 (4473) | 4142 (2576-7141) |  |
| YES | 23 | 4593 (3031) | 5195 (3603-8425) |  |
| Hepatitis |  |  |  | 0.078 |
| NO | 804 | 5367 (4044) | 4142 (2630-7109) |  |
| YES | 21 | 8825 (11954) | 5372 (4104-8872) |  |
| Electrolyte abnormalities*** |  |  |  | <0.001 |
| NO | 805 | 5296 (3965) | 4114 (2571-7067) |  |
| YES | 20 | 11848 (12048) | 9041 (5611-14426) |  |
| Venous thrombosis*** |  |  |  | <0.001 |
| NO | 811 | 5321 (3966) | 4114 (2603-7084) |  |
| YES | 14 | 13221 (14228) | 7956 (5283-15995) |  |
| Interstitial lung disease |  |  |  | 0.807 |
| NO | 812 | 5456 (4453) | 4179 (2630-7299) |  |
| YES | 13 | 5370 (3578) | 4387 (3224-4672) |  |
| Urinary tract infection* |  |  |  | 0.036 |
| NO | 812 | 5430 (4452) | 4145 (2630-7109) |  |
| YES | 13 | 6996 (3286) | 6826 (4539-9600) |  |
| Cardiac dysfunction |  |  |  | 0.342 |
| NO | 813 | 5440 (4438) | 4162 (2636-7157) |  |
| YES | 12 | 6450 (4572) | 5807 (3053-8215) |  |
| Bloodstream infection*** |  |  |  | <0.001 |
| NO | 817 | 5306 (3904) | 4145 (2636-7081) |  |
| YES | 8 | 20640 (16619) | 15616 (10662-21033) |  |
| EBV/CMV infection** |  |  |  | 0.004 |
| NO | 817 | 5403 (4394) | 4145 (2636-7089) |  |
| YES | 8 | 10740 (6033) | 9352 (7148-13762) |  |
| Pulmonary embolism |  |  |  | 0.990 |
| NO | 819 | 5456 (4445) | 4196 (2646-7320) |  |
| YES | 6 | 5284 (3847) | 4081 (2843-5843) |  |
| Upper respiratory tract infection |  |  |  | 0.650 |
| NO | 821 | 5452 (4431) | 4200 (2658-7278) |  |
| YES | 4 | 5990 (6678) | 3216 (2262-6944) |  |
| Respiratory failure |  |  |  | 0.730 |
| NO | 822 | 5444 (4422) | 4179 (2656-7254) |  |
| YES | 3 | 8436 (8822) | 5278 (3453-11840) |  |

DICU, dermatology intensive care unit; IQR, interquartile range; SD, standard deviation. *p-value＜0.05, **p-value＜0.01, ***p-value＜0.001.
